# Supplementary material
Source: PubMed Central journal article supplement (PMC5354312)
Supplement: jp6b12828_si_001.pdf [file jp6b12828_si_001.pdf]

# Supporting Information

## **Photon Reabsorption in Mixed CsPbCl<sub>3</sub>:CsPbI<sub>3</sub> Perovskite Nanocrystal Films for Light-Emitting Diodes**

Nathaniel J. L. K. Davis<sup>a</sup>, Francisco J. de la Peña<sup>b</sup>, Maxim Tabachnyk<sup>a</sup>, Johannes M. Richter<sup>a</sup>, Robin D. Lamboll<sup>a</sup>, Edward P. Booker<sup>a</sup>, Florencia Wisnivesky Rocca Rivarola<sup>b</sup>, James T. Griffiths<sup>b</sup>, Caterina Ducati<sup>b</sup>, S. Matthew Menke<sup>a</sup>, Felix Deschler<sup>a</sup> and Neil C. Greenham<sup>a\*</sup>

<sup>a</sup> Cavendish Laboratory, University of Cambridge, J.J. Thomson Avenue, Cambridge, CB3 0HE, UK

<sup>b</sup> Department of Materials Science and Metallurgy, University of Cambridge, 27 Charles Babbage Road, Cambridge, CB3 0FS, UK

\* Email: [ncg11@cam.ac.uk](mailto:ncg11@cam.ac.uk)

Phone: +44 (0)1223 766301

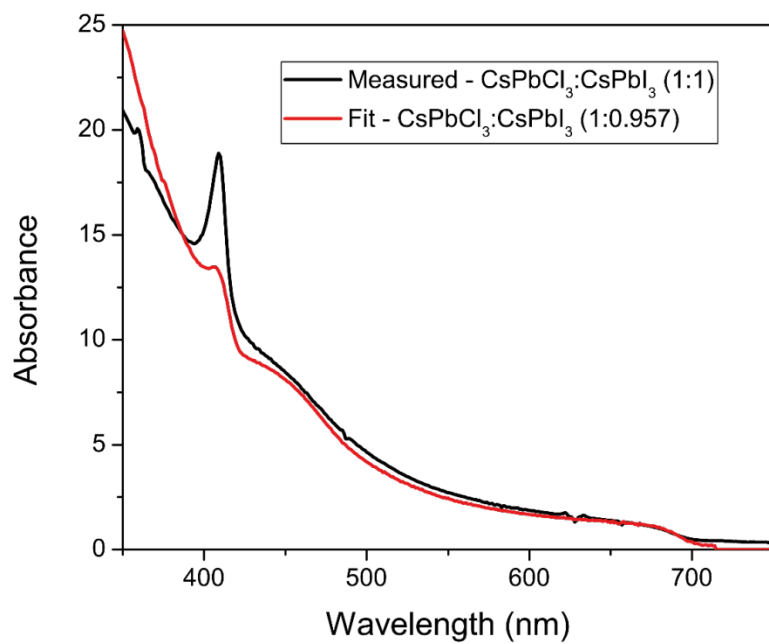

Figure S1: Measured absorbance and modelled absorbance spectrum of the mixed 1:1 solutions.

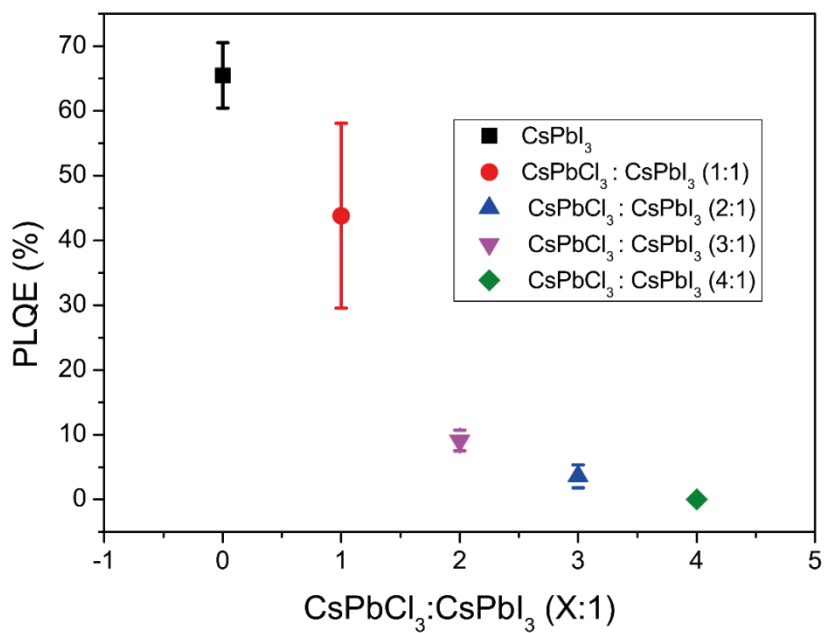

Figure S2: Photoluminescence quantum efficiency of different CsPbCl<sub>3</sub>:CsPbI<sub>3</sub> blend ratios in PMMA.

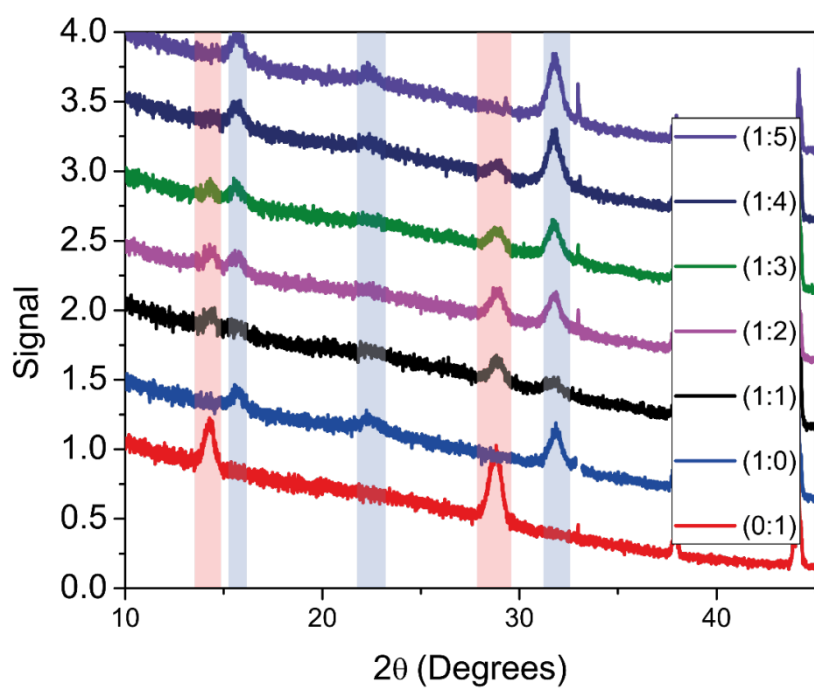

Figure S3: Powder X-ray diffraction pattern of different CsPbCl<sub>3</sub>:CsPbI<sub>3</sub> blend ratios in PMMA. Highlighted region denote peaks associated with CsPbI<sub>3</sub> nanocrystals (red) and CsPbCl<sub>3</sub> nanocrystals (blue).

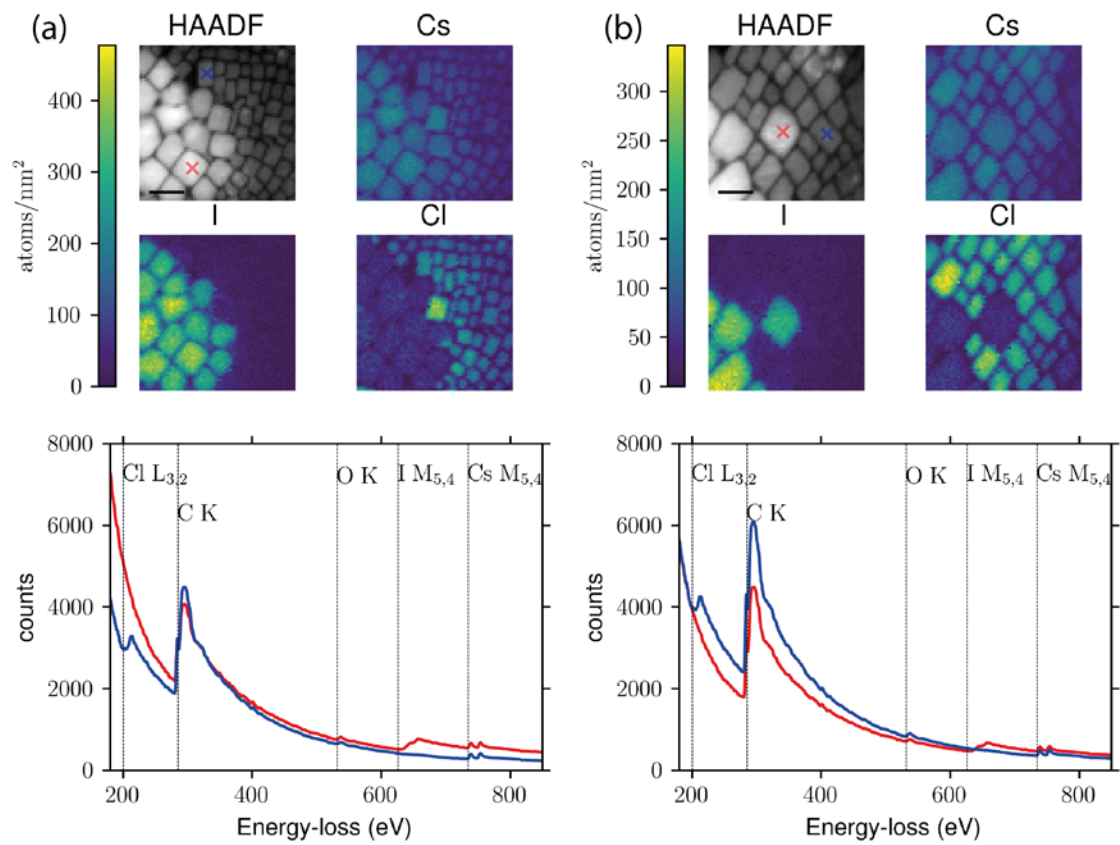

Figure S4: Two different ((a) and (b)) HAADF and EELS TEM scans of different regions. Both samples show  $\text{CsPbCl}_3$  and  $\text{CsPbI}_3$  nanocrystals are not homogenously mixed. Lines indicated atom absorption edges.

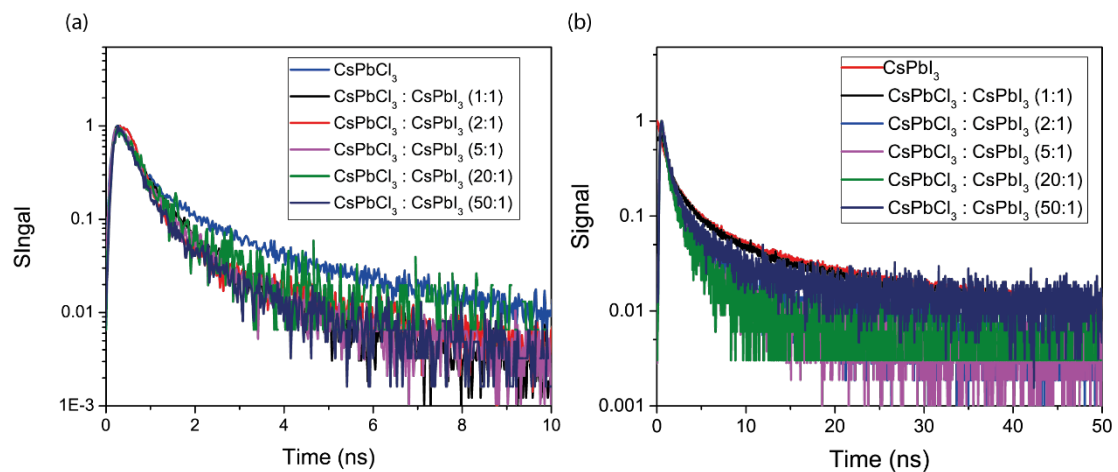

Figure S5: Transient decays for different nanocrystal polymer films excited at 405 nm and measured at 450 nm (a) and 670 nm (b).

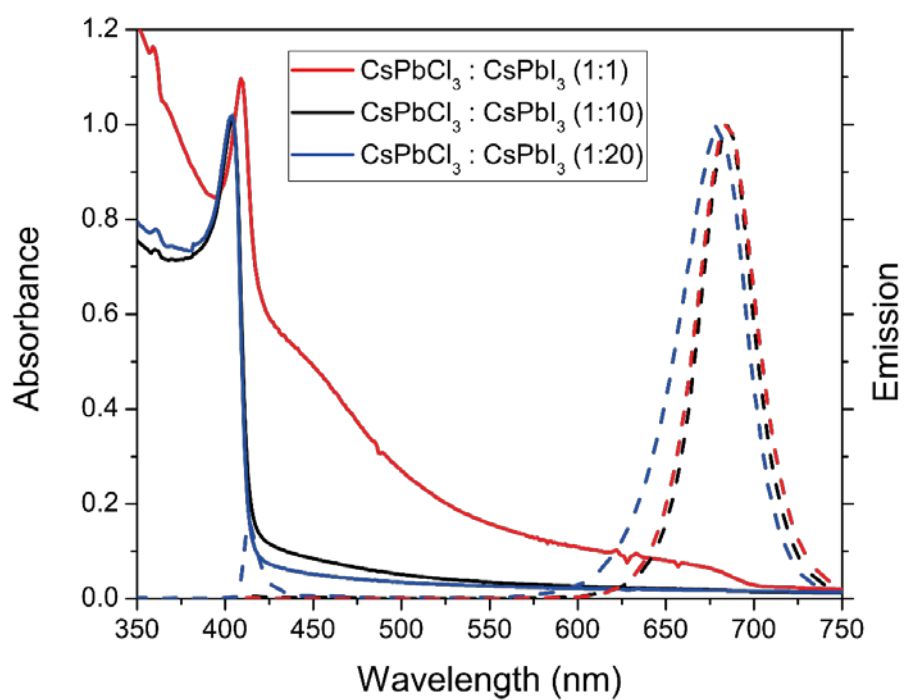

Figure S6: Solution absorbance (solid) and emission (dashed) of  $\text{CsPbCl}_3:\text{CsPbI}_3$  blends in hexane. While the concentration of  $\text{CsPbI}_3$  remained constant at  $0.021 \text{ mg mL}^{-1}$ , the concentration of  $\text{CsPbCl}_3$  was  $0.021 \text{ mg mL}^{-1}$ ,  $0.21 \text{ mg mL}^{-1}$  and  $0.42 \text{ mg mL}^{-1}$  for the 1:1, 1:10, 1:20 blends respectively.

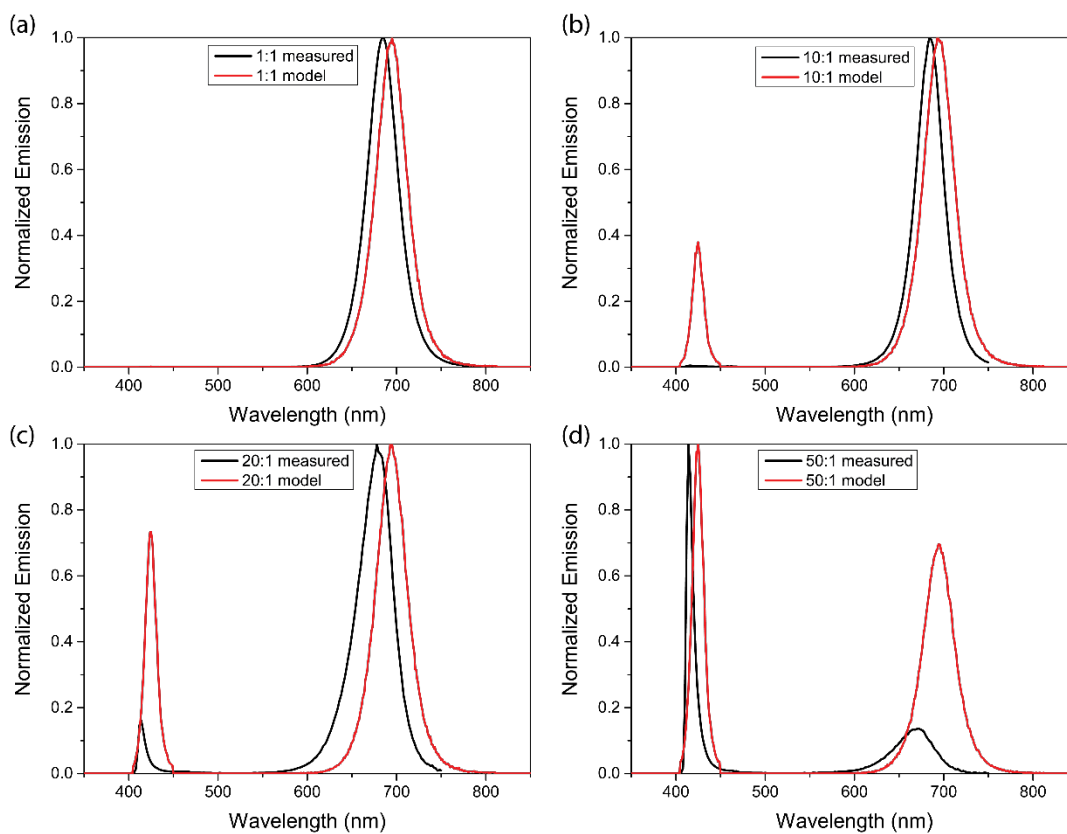

Figure S7: Monte Carlo simulations of emission spectra from different nanocrystal solutions with different  $\text{CsPbCl}_3:\text{CsPbI}_3$  ratios ((a)-(d)). The results of these simulations show that we expect there to only be a red peak visible from the 1:1  $\text{PbCsCl}_3:\text{PbCsI}_3$  mixture, but that a blue peak should grow as the  $\text{PbCsCl}_3$  fraction increases, becoming larger than the red peak when we have a 50:1 ratio. This is qualitatively consistent with the measured behaviour.

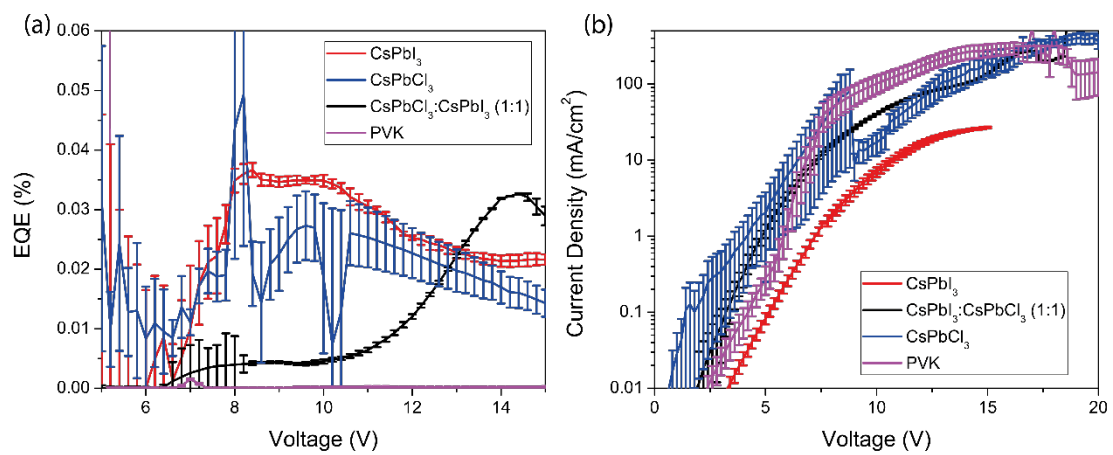

Figure S8: (a) External quantum efficiencies of LED devices. (b) Current density/voltage characteristic of LED devices.
